# Supplementary material for: Divergent biosynthesis of indole alkaloids FR900452 and spiro-maremycins
Source: Royal Society of Chemistry journal article supplement (doi:10.1039/c8ob01181h), 2018-01-01
Supplement: c8ob01181h1.pdf [file c8ob01181h1.pdf]

Electronic Supplementary Information

**Divergent Biosynthesis of Indole Alkaloids FR900452 and  
Spiro-maremycins**

Yingyi Duan,<sup>a</sup> Yanyan Liu,<sup>a</sup> Tao Huang,<sup>b</sup> Yi Zou,<sup>c</sup> Tingting Huang,<sup>a</sup>  
Kaifeng Hu,<sup>b</sup> Zixin Deng<sup>a</sup> and Shuangjun Lin<sup>\*a</sup>

<sup>a</sup> State Key Laboratory of Microbial Metabolism, Joint International Laboratory of Metabolic & Developmental Sciences, School of Life Sciences & Biotechnology, Shanghai Jiao Tong University, Shanghai, 200240, P. R. China.

<sup>b</sup> Kunming Institute of Botany, Chinese Academy of Science, Kunming, P. R. China.

<sup>c</sup> College of Pharmaceutical Science and Chinese Medicine, Southwest University, Chongqing, P. R. China.

\*Correspondence to S.L.: [linsj@sjtu.edu.cn](mailto:linsj@sjtu.edu.cn)

**Contents**

|                                      |           |
|--------------------------------------|-----------|
| <b>General .....</b>                 | <b>1</b>  |
| <b>Experimental Procedures .....</b> | <b>2</b>  |
| <b>Tables .....</b>                  | <b>5</b>  |
| <b>Results Figures .....</b>         | <b>15</b> |
| <b>NMR Figures .....</b>             | <b>23</b> |
| <b>References .....</b>              | <b>30</b> |

## General

Strains and plasmids/cosmids used in this study are listed in Table S1. DNA isolation and manipulation were carried out following standard procedures for *E. coli* and *Streptomyces*. Primers were synthesized by Sangon Biotech Co., Ltd (Shanghai, China) and DNA sequencing was accomplished at Shanghai Majorbio Biotech Co., Ltd (Shanghai, China). PCR amplifications were performed on a Veriti Thermal Cycler (Applied Biosystems, Carlsbad, CA) using high fidelity PCR DNA-polymerase or Taq DNA polymerase (Vazyme Biotech Co. Ltd., Nanjing, China). EasyPure RNA Kit and TransScript One-Step RT-PCR SuperMix kit used in RT-PCR were purchased from TransGen Biotech Co., Ltd (Beijing, China). All the restriction enzymes and T4 DNA ligase were purchased from Thermo Fisher Scientific. Agents and chemicals were purchased from Sigma Aldrich, TCI (Shanghai) or Sangon Biotech.

*E. coli* were cultured at 37 °C in LB liquid/solid medium for 12 - 15 h. *Streptomyces* were cultured in TSB media (3% tryptone soy broth) at 30 °C for 24 h to prepare the seed culture. 4 mL of the seed cultures were then transferred into 50 mL ISP2 liquid fermentation medium (0.4% glucose, 0.4% yeast extract, 1% malt extract, pH 7.0) and incubated on a rotary shaker (220 rpm) at 30 °C for 24 - 96 h. MS agar plates (2% mannitol, 2% soybean meal and 2% agar) was used for sporulation of *Streptomyces* and conjugation. The media were supplemented with appropriate antibiotics for selection: thiostrepton 25 µg/mL, kanamycin 50 µg/mL and apramycin 30 µg/mL for *Streptomyces*; apramycin 30 µg/mL, kanamycin 50 µg/mL, ampicillin 100 µg/mL, spectinomycin 50 µg/mL and chloramphenicol 25 µg/mL for *E. coli*.

For compound analysis, fermentation broth was extracted three times with equal volume of ethyl acetate. Combined extract was concentrated and re-dissolved in methanol, then centrifuged (13000 rpm, 8 min), filtered, and subjected to HPLC and liquid chromatography/MS (LC-MS) analysis. HPLC analysis was performed on a ZORBAX Eclipse-XDB-C18 column (250 x 4.6 mm, 5 µm, Agilent) and carried out with an Agilent 1260 HPLC system. The column was equilibrated with 95% solvent A (H<sub>2</sub>O) and 5% solvent B (CH<sub>3</sub>CN). The program of HPLC analysis was developed as follows: 0-15 min, 5% to 40% B; 15-22 min, 40%-70% B; 22-27 min, 70%-100% B; 27-30 min, 100% B; 30-33 min, 100%-5% B; 33-40 min, 5% B. This process was carried out at a flow rate of 0.6 mL/min and UV detection at 210 nm, 254 nm and 347 nm. LC-MS was performed under the same conditions (except that the flow rate is 0.4 mL/min for LC-MS) on an Agilent 6120 Quadruple LC/MS system operated in positive ion electrospray mode.

For the structure elucidation, the purified compounds were subjected to HRMS and NMR analysis. NMR spectra were recorded on Bruker AV-III 600 (600 MHz) spectrometers. LC-QTOF-MS analysis was performed on a 6530 Accurate-Mass Q-TOF spectrometer coupled to an Agilent HPLC 1200 series (Agilent Technologies).

## Experimental Procedures

### Construction of gene inactivation and complementation mutants.

The genomic library of *Streptomyces* sp. B9173 was constructed with the vector pJTU2463 (*Apr<sup>R</sup>*)<sup>1</sup>. In the library, cosmid 20G3 contains *marB* ~ *marQ* and the downstream ~20 kb sequences, while cosmid 24B6 contains *marA* ~ *marP* and the upstream ~25 kb sequences (see Fig. S5). Cosmid 20G3 and 24B6 were subcloned to shuttle vector pJTU1289 (*Amp<sup>R</sup>*) to generate plasmids pJL0a and pLS0b as the template for gene inactivation.

Strategy of PCR-targeting based on the  $\lambda$ -Red recombination functions was performed to disrupt the genes of interest (*marA*, *marB*, *marC*, *marD*, *marL*, *marM*, *marP* and *marQ*). Each target gene in the template plasmids was replaced by the apramycin resistance gene *aac(3)IV* + *oriT* (RK2). Recombination plasmids for gene replacement were further introduced into *Streptomyces* sp. B9173 by conjugation from *E. coli* ET12567/pUZ8002. The gene inactivation mutant strains were selected by apramycin resistance and trimethoprim (50  $\mu$ g/mL), and the genetic phenotype of the mutants was further confirmed by PCR (see Fig. S2).

For the gene complementation of *mar* mutants, the corresponding gene was cloned into pJTU2170 (*Km<sup>R</sup>*) *E. coli*–*Streptomyces* expression shuttle vector which contains the *ermE*\* strong promoter, generating plasmids pJL1008 ( $\Delta$ *marP*::*marP*), pJL1009 ( $\Delta$ *marA*::*marA*), pJL1010 ( $\Delta$ *marD*::*marD*), pJL1011 ( $\Delta$ *marL*::*marL*) and pJL1012 ( $\Delta$ *marM*::*marM*), respectively. The constructed plasmids was further introduced into corresponding *Streptomyces* mutant strains by conjugation from *E. coli* ET12567/pUZ8002 to afford the JL1008 ~ JL1012. Exconjugants were selected by kanamycin and trimethoprim (50  $\mu$ g/mL).

### Overexpression of *marP* gene in *Streptomyces* sp. B9173.

The constructed pJL1008 was introduced into *Streptomyces* sp. B9173 wild type (WT) to afford the JL1008a, which was used for the overexpression of *marP* in WT strain. Kanamycin-sensitive screening was used to identify the mutant strain. Transcription level of *marP* in B9173 WT and JL1008a were analyzed by semiquantative RT-PCR with the following procedure. Mycelia were collected from the culturing broth of *Streptomyces* and applied to the isolation of total RNA. The total RNA was extracted and purified using

EasyPure RNA Kit. The strand cDNA was synthesized from the purified RNA by using TransScript One-Step RT-PCR SuperMix kit. Amplification of cDNA was carried out to perform semi-quantitative RT-PCR analysis. Corresponding primers are listed in Table S2.

### **Real-time quantitative RT-PCR.**

Real-time quantitative RT-PCR was carried out to analysis the transcription level of *marP* in different growth periods of *Streptomyces* sp. B9173. The isolation of total RNA, the synthesis and amplification of corresponding cDNA followed the procedure described above. The amplified products of the *marP* gene and *hrdb* gene (house-keeping gene) were less than 200 bp, and they were further applied to quantitative real-time PCR. Reactions were performed by using SYBR Green qPCR Master Mix (Thermo Fisher Scientific Inc.) and ABI7500 Fast Real Time System (Applied Biosystems). Reaction conditions followed a reported method from Dai.<sup>2</sup>

### **Cosmid combination and heterologous expression of *mar* cluster in *S. lividans* TK24.**

The procedure shown in Fig. S6 was used to combine the cosmid 20G3 and cosmid 24B6 for heterologous expression. (1) Using the PCR targeting method, spectinomycin resistance cassette was inserted into cosmid 20G3 at the position between B9173 genome segment and vector pJTU2463 (*Apr<sup>R</sup>*), generating a new cosmid 20G3 (*Spec<sup>R</sup>*). (2) The cosmid 20G3 (*Spec<sup>R</sup>*) was digested by enzyme *Dra*I and *Spe*I to get a fragment that included *marB* ~ *marQ* (16.5 kb) and vector (5.6 kb) segment. (3) With *marB* ~ *marQ* (16.5 kb) and vector (5.6 kb) segment serving as left and right homologous flanks respectively, this fragment was further recombined with cosmid 24B6 with PCR targeting method, resulting in a recombined plasmid pJL1001 (*Spec<sup>R</sup>Apr<sup>R</sup>*) which covers the complete maremycin gene cluster (~17 kb), the upstream genes (~25 kb) and downstream genes (~20 kb).

In order to generate a plasmid with only the *mar* gene cluster, the upstream and downstream fragment were both deleted, following the procedure: (1) By using PCR targeting system, the downstream (~20 kb) fragment in pJL1001 was replaced with the kanamycin resistance gene to generate the plasmid pLJ1001D (*Km<sup>R</sup>Apr<sup>R</sup>*). (2) The kanamycin resistance gene in pLJ1001D was excised by enzyme *Nde*I, and then the digested pLJ1001D was self-ligated by T4 DNA ligase, generating a plasmid pJL1001Ds (*Apr<sup>R</sup>*). (3) The upstream (~25 kb) genes in pJL1001Ds were then replaced by kanamycin resistance gene via PCR-targeting, generating plasmid pJL1001C (*Km<sup>R</sup>Apr<sup>R</sup>*) which contained the *mar* gene cluster.

The constructed plasmids pJL1001C were further introduced into *S. lividans* TK24 by conjugation from *E. coli* S17-1. Vector pJTU2463 was also introduced into *S. lividans* TK24

to afford *S. lividan*/pJTU2463 as control. Exconjugants were selected by nalidixic acid (25 µg/mL) and apramycin.

#### **Feeding experiment with FR900452 (1)**

For the feeding experiment with FR900452 (**1**), 0.6 mg **1** was dissolved in 100 µL DMSO. *ΔmarM* and *ΔmarQ* mutants were cultured for 48 h, then the dissolved **1** was added into the culture broth, and the fermentation continued until 96 h. Metabolites from the feeding experiment were extracted, and then analyzed by HPLC and LC-MS analysis as mentioned above.

#### **Isolation of FR900452s from *Streptomyces* sp. B9173.**

For large-scale fermentation of *Streptomyces* and isolation of the metabolites, 2 L Erlenmeyer flasks containing 500 mL ISP2 medium with 8% (v/v) seed culture were incubated at 30 °C for 48 h (for **1** and **2**) and 72 h (for **3**). The culture broth was extracted three times with equal volume ethyl acetate and the combined extracts were concentrated in vacuo. The crude extract was fractionated by silica gel with ethyl acetate/methanol solvent system. The fraction washed with ethyl acetate: methanol (20:1) was collected, and then purified on reverse phase silica gel (C18, YMC, Japan) using a gradient of MeOH in water, yielding **1** (78 mg), **2** (8 mg) and **3** (12 mg).

## Tables

**Table S1.** Strains and plasmids used in this study.

| Strains/Plasmids              | Characteristics                                                     | Source/Ref.      |
|-------------------------------|---------------------------------------------------------------------|------------------|
| <b><i>Streptomyces</i></b>    |                                                                     |                  |
| <i>Streptomyces</i> sp. B9173 | Native producer of maremycins and FR900452s                         | 3                |
| <i>S. lividans</i> TK24       | heterologous host for the expression of maremycin gene cluster      | Laboratory stock |
| LS24                          | <i>Streptomyces</i> sp. B9173 ( $\Delta marC::aac(3)IV$ )           | 4                |
| LS29                          | <i>Streptomyces</i> sp. B9173 ( $\Delta marM::aac(3)IV$ )           | 4                |
| JL1002                        | <i>Streptomyces</i> sp. B9173 ( $\Delta marA::aac(3)IV$ )           | This work        |
| JL1003                        | <i>Streptomyces</i> sp. B9173 ( $\Delta marB::aac(3)IV$ )           | This work        |
| JL1004                        | <i>Streptomyces</i> sp. B9173 ( $\Delta marD::aac(3)IV$ )           | This work        |
| JL1005                        | <i>Streptomyces</i> sp. B9173 ( $\Delta marL::aac(3)IV$ )           | This work        |
| JL1006                        | <i>Streptomyces</i> sp. B9173 ( $\Delta marP::aac(3)IV$ )           | This work        |
| JL1007                        | <i>Streptomyces</i> sp. B9173 ( $\Delta marQ::aac(3)IV$ )           | This work        |
| JL1008a                       | <i>Streptomyces</i> sp. B9173 (WT::marP)                            | This work        |
| JL1008b                       | <i>Streptomyces</i> sp. B9173 ( $\Delta marP::marP$ )               | This work        |
| JL1009                        | <i>Streptomyces</i> sp. B9173 ( $\Delta marA::marA$ )               | This work        |
| JL1010                        | <i>Streptomyces</i> sp. B9173 ( $\Delta marD::marD$ )               | This work        |
| JL1011                        | <i>Streptomyces</i> sp. B9173 ( $\Delta marL::marL$ )               | This work        |
| JL1012                        | <i>Streptomyces</i> sp. B9173 ( $\Delta marM::marM$ )               | This work        |
| <i>S. lividans</i> . JL1001C  | Heterologous expression strain of pJL1001C                          | This work        |
| <i>S. lividans</i> /pJTU2463  | <i>Streptomyces lividans</i> TK24 containing the vector pJTU2463    | This work        |
| <b><i>E. coli</i></b>         |                                                                     |                  |
| DH10B                         | Host for gene cloning                                               | Laboratory stock |
| BW25113/pIJ790                | Host for PCR-targeting system                                       | 5                |
| DH5 $\alpha$ /BT340           | Host for in-frame deletion of genes                                 | 6                |
| ET12567/pUZ8002               | Donor strain for <i>E. coli</i> - <i>Streptomyces</i> exconjugation | 6                |

|                                         |                                                                                                                                                                                              |                  |
|-----------------------------------------|----------------------------------------------------------------------------------------------------------------------------------------------------------------------------------------------|------------------|
| S17-1                                   | Strain used for <i>E.coli-Streptomyces</i> exconjugation                                                                                                                                     | Laboratory stock |
| <b>Plasmids</b>                         |                                                                                                                                                                                              |                  |
| pJTU2463                                | Shuttle vector used for construction of genomic cosmid library, <i>ori</i> (ColE1), <i>intattP</i> φC31, <i>oriT</i> (RK2), <i>cos</i> , <i>aac(3)IV</i>                                     | Laboratory stock |
| pJTU2170                                | Shuttle vectors for gene complementation and overexpression                                                                                                                                  | Laboratory stock |
| pJTU1278                                | Shuttle vectors for gene replacement, <i>oriT</i> (RP4), <i>ori</i> (ColE1), <i>bla</i> , <i>tsr</i> , <i>cos</i> , <i>rep</i> (pIJ101), <i>ori</i> (pIJ101), <i>lacZ</i>                    | Laboratory stock |
| pJTU1289                                | <i>oriT</i> region of pJTU1278 deleted for gene replacement in PCR-targeting system                                                                                                          | Laboratory stock |
| pJTU4659                                | Kan FRT ligased to pBSK+ (EcoRI-SmaI)                                                                                                                                                        | Laboratory stock |
| Cosmid 20G3                             | A cosmid which contains <i>marB</i> ~ <i>marQ</i> and the downstream ~20 kb genes                                                                                                            | 4                |
| Cosmid 24B6                             | A cosmid which contains <i>marA</i> ~ <i>marP</i> and the upstream ~25 kb genes                                                                                                              | 4                |
| Cosmid 20G3 ( <i>Spec<sup>R</sup></i> ) | Cosimid 20G3 inserted with spectinomycin resistance gene                                                                                                                                     | This work        |
| pJL0a                                   | An 9 kb fragment from cosmid 24B6 (digested by KpnI) was cloned into the corresponding site of pJTU1289 and used for <i>marA</i> , <i>marB</i> and <i>marD</i> gene replacement              | This work        |
| pLS0b                                   | An 18 kb fragment from cosmid 20G3 (digested by XbaI and HindIII) was cloned into the corresponding site of pJTU1289 and used for <i>marL</i> , <i>marP</i> and <i>marQ</i> gene replacement | 4                |
| pJL1002                                 | <i>marA</i> in the pJL0a was substituted by the <i>aac(3)IV+oriT</i> cassette using the PCR targeting strategy                                                                               | This work        |
| pJL1003                                 | <i>marB</i> in the pJL0a was substituted by the <i>aac(3)IV+oriT</i> cassette using the PCR targeting strategy                                                                               | This work        |
| pJL1004                                 | <i>marD</i> in the pJL0a was substituted by the <i>aac(3)IV+oriT</i> cassette using the PCR targeting strategy                                                                               | This work        |
| pJL1005                                 | <i>marL</i> in the pLS0b was substituted by the <i>aac(3)IV+oriT</i> cassette using the PCR targeting strategy                                                                               | This work        |
| pJL1006                                 | <i>marP</i> in the pLS0b was substituted by the <i>aac(3)IV+oriT</i> cassette using the PCR targeting strategy                                                                               | This work        |
| pJL1007                                 | <i>marQ</i> in the pLS0b was substituted by the <i>aac(3)IV+oriT</i> cassette using the PCR targeting strategy                                                                               | This work        |
| pJL1008                                 | The complementary <i>marP</i> constructed on vector pJTU2170                                                                                                                                 | This work        |
| pJL1001                                 | Recombined cosmid of cosmid 20G3 and cosmid 24B6                                                                                                                                             | This work        |
| pJL1009                                 | The complementary <i>marA</i> constructed on vector pJTU2170                                                                                                                                 | This work        |
| pJL1010                                 | The complementary <i>marD</i> constructed on vector pJTU2170                                                                                                                                 | This work        |
| pJL1011                                 | The complementary <i>marL</i> constructed on vector pJTU2170                                                                                                                                 | This work        |
| pJL1012                                 | The complementary <i>marM</i> constructed on vector pJTU2170                                                                                                                                 | This work        |
| pJL1001D                                | pJL1001 with downstream ~20 kb genes substituted by kanamycin resistance gene                                                                                                                | This work        |

|           |                                                         |           |
|-----------|---------------------------------------------------------|-----------|
| pJL1001Ds | pJL1001D with kanamycin resistance gene excised         | This work |
| pJL1001C  | pJL1001 with both upstream and downstream genes excised | This work |

*Amp<sup>R</sup>*, ampicillin resistance; *Km<sup>R</sup>*, kanamycin resistance; *Apr<sup>R</sup>*, apramycin resistance; *Spec<sup>R</sup>*, spectinomycin resistance.



**Table S2.** PCR primers used in this study.

| Primer name      | Sequence 5'-3'                                                   | Description                                                                                |
|------------------|------------------------------------------------------------------|--------------------------------------------------------------------------------------------|
| <i>marATarF</i>  | gtgtgcatcaccggaatgggctggaccacagcactgggtattccggg<br>gatccgtcgacc  | Primers for <i>marA</i> inactivation                                                       |
| <i>marATarR</i>  | tcacgcggcactcccggtcacggtcgcgggtcgccggctgtaggct<br>ggagctgcttc    |                                                                                            |
| <i>marAVtarF</i> | tcggaacaccgggggggattta                                           | Primers for the verification of<br><i>marA</i> inactivation                                |
| <i>marAVtarR</i> | gggcatgggcagcatcgacac                                            |                                                                                            |
| <i>marBTarF</i>  | gtccccggggtctacgccgatccggctggcctggctgatgattccggg<br>gatccgtcgacc | Primers for <i>marB</i> inactivation                                                       |
| <i>marBTarR</i>  | gcgaggtggctctcgcggggtggtgttctgcgaggtcatgtaggctg<br>gagctgcttc    |                                                                                            |
| <i>marBVtarF</i> | gtgatcaccggctccgcct                                              | Primers for the verification of<br><i>marB</i> inactivation                                |
| <i>marBVtarR</i> | gacgacaccggggtcgagaa                                             |                                                                                            |
| <i>marDTarF</i>  | gtgacggggccccgaaccgctcacctgttctgcgtcccattccggg<br>gatccgtcgacc   | Primers for <i>marD</i> inactivation                                                       |
| <i>marDTarR</i>  | tcaccgctcgaagcgttcgtggaggaagaagtggccgctgtaggct<br>ggagctgcttc    |                                                                                            |
| <i>marDVtarF</i> | atccagccgctgcgcggggc                                             | Primers for the verification of<br><i>marD</i> inactivation                                |
| <i>marDVtarR</i> | tggacggcagtgctctcggt                                             |                                                                                            |
| <i>marLTarF</i>  | gacaccctggaagcgactctcaaggagatcctcgtcgagattccggg<br>gatccgtcgacc  | Primers for <i>marL</i> inactivation                                                       |
| <i>marLTarR</i>  | ggcgcccgtgcgcagggcgcgacgagatcgccaccgtttagg<br>ctggagctgcttc      |                                                                                            |
| <i>marLVtarF</i> | atgacagccggttcgggcga                                             | Primers for the verification of<br><i>marL</i> inactivation                                |
| <i>marLVtarR</i> | ccagacgtccaactgctc                                               |                                                                                            |
| <i>marPTarF</i>  | ccgcaccgcttacgacgccctaaccgaggagcacgcatgattccgg<br>ggatccgtcgacc  | Primers for <i>marP</i> inactivation                                                       |
| <i>marPTarR</i>  | ccctcttcagcgggttcgcggatgcgtgggcaggggtcatgtaggctg<br>gagctgcttc   |                                                                                            |
| <i>marPVtarF</i> | cgaccgtcagttctgctgt                                              | Primers for the verification of<br><i>marP</i> inactivation                                |
| <i>marPVtarR</i> | tgtcgcgtcatctgctctg                                              |                                                                                            |
| <i>CmarPF</i>    | ggaattccatatgtccgtcaccgccgacctctac                               | Primers for the<br>complementation of <i>marP</i>                                          |
| <i>CmarPR</i>    | ggaattctcagatcaccgctccgtac                                       |                                                                                            |
| <i>hrdB-F</i>    | gcggtggagaagttcgacta                                             | Primers for semi-quantitative<br>and real-time quantitative RT-<br>PCR of <i>hrdB</i> gene |
| <i>hrdB-R</i>    | ttgatgacctcgacctgtg                                              |                                                                                            |
| <i>marP-RTF</i>  | gtcaccgccgacctctacat                                             | Primers for semi-quantitative<br>and real-time quantitative RT-<br>PCR of <i>marP</i> gene |
| <i>marP-RTR</i>  | tcttggtacgcatgcctc                                               |                                                                                            |

|                         |                                                                         |                                                                                              |
|-------------------------|-------------------------------------------------------------------------|----------------------------------------------------------------------------------------------|
| <i>marQ</i> TarF        | atgacgcgacagccggcagagcgaccgacggcgaaccgattccg<br>gggatccgtcgacc          | Primers for <i>marQ</i> inactivation                                                         |
| <i>marQ</i> TarR        | cggtcacccccccggcggtcacccccctggcggtcatgtaggctg<br>gagctgcttc             |                                                                                              |
| <i>marQ</i> VtarF       | atgacgcgacagccggcagag                                                   | Primers for the verification of<br><i>marQ</i> inactivation                                  |
| <i>marQ</i> VtarR       | gcccccccgggcggtca                                                       |                                                                                              |
| <i>Cmar</i> AF          | ggaattccatatggtgtgcatcacgggaatggg                                       | Primers for the<br>complementation of <i>marA</i>                                            |
| <i>Cmar</i> AR          | ggaattctcacggcgactcccggtcacggtc                                         |                                                                                              |
| <i>Cmar</i> DF          | ggaattccatatggtgacgggccccgaaccgct                                       | Primers for the<br>complementation of <i>marD</i>                                            |
| <i>Cmar</i> DR          | ggaattctcacggcgcccgctcgccgct                                            |                                                                                              |
| <i>Cmar</i> LF          | ggaattccatatgacagccggttcgggcgagaca                                      | Primers for the<br>complementation of <i>marL</i>                                            |
| <i>Cmar</i> LR          | ggaattctcactcgggaccgccaggtgctc                                          |                                                                                              |
| <i>Cmar</i> MF          | ggaattccatatgagggaacaggcctcctcc                                         | Primers for the<br>complementation of <i>marM</i>                                            |
| <i>Cmar</i> MR          | ggaattctcaggagtgtcgggggag                                               |                                                                                              |
| <i>20G3Spec</i> F       | gcccagttcaagccggaacggttcaccctctacacgatgattccgggg<br>atccgtcgacc         | Primers for the spectinomycin<br>resistance gene insertion                                   |
| <i>20G3Spec</i> R       | tcttcggcccgacgacgctgaggccgacgctcagcgctcatgtaggct<br>ggagctgcttc         |                                                                                              |
| <i>20G3Spec</i> VF      | tcattggcggacaacgaga                                                     | Primers for the verification of<br>spectinomycin resistance gene<br>insertion                |
| <i>20G3Spec</i> VR      | ggcgtcgtgtaaccaccca                                                     |                                                                                              |
| <i>upstream</i> TarF    | caggcgaccgtcacccggcggtcgccgcagcagcgcatggtta<br>acagctattccagaagtagt     | Primers for ~25 kb upstream<br>genes deletion in pJL1001Ds                                   |
| <i>upstream</i> TarR    | gtgcgcccgaacgggggttccctatagagggttgctcagtttaact<br>ggatgccgacggatttg     |                                                                                              |
| <i>upstream</i> VtarF   | gaagaacgtcgtctgccgc                                                     | Primers for the verification of<br>upstream genes deletion                                   |
| <i>upstream</i> VtarR   | cagggtggcgccggcggggtg                                                   |                                                                                              |
| <i>downstream</i> TarF  | tcgatgagttcgttcatctggttcgggctgagcttctccagccatatgag<br>ctattccagaagtagt  | Primers for ~20 kb downstream<br>genes deletion in pJL1001                                   |
| <i>downstream</i> TarR  | ggatcttcggcccgacgacgctgaggccgacgctcagcgctcacatat<br>gtggatgccgacggatttg |                                                                                              |
| <i>downstream</i> VtarF | cgaccaggctggtcttcttg                                                    | Primers for the verification of<br>downstream genes deletion                                 |
| <i>downstream</i> VtarR | ggatcttcggcccgacgac                                                     |                                                                                              |
| <i>marA</i> PCR-F       | gctcagagcgtttatcgaac                                                    | PCR primers for <i>marA</i><br>verification in pJL1001,<br>pJL1001D and pJL1001C             |
| <i>marA</i> PCR-R       | ggcgaggagccgggtgatcac                                                   |                                                                                              |
| <i>MarQ</i> innerPCR-F  | cgcagatcgacacctatg                                                      | primers for the PCR of 750 bp<br>segment of <i>marQ</i> in pJL1001,<br>pJL1001D and pJL1001C |
| <i>MarQ</i> innerPCR-R  | ccactggatgacgttgac                                                      |                                                                                              |

**Table S3.** Proposed functions of proteins encoded by genes in the maremycin biosynthetic gene cluster

| ORF         | Size (aa) | Proposed function, Homologous protein                             | Identity/ Similarity | Sequence similarity origin                               |
|-------------|-----------|-------------------------------------------------------------------|----------------------|----------------------------------------------------------|
| <i>marA</i> | 369       | Coronafacic acid beta-keto acyl synthetase component, cfa3        | 90%/91%              | <i>Pseudomonas syringae</i> pv. <i>aesculi</i> str. 2250 |
| <i>marB</i> | 171       | Coronafacic acid synthetase component, cfa4                       | 39%/55%              | <i>Pseudomonas syringae</i>                              |
| <i>marC</i> | 512       | Coronafacic acid synthetase, ligase component, cfa5               | 42%/54%              | <i>Bacillus cereus</i> NVH0597-99                        |
| <i>marD</i> | 240       | Thioesterase                                                      | 30%/49%              | <i>Bacillus cereus</i> AH1134                            |
| <i>marE</i> | 284       | Tryptophan 2,3-dioxygenase                                        | 27%/41%              | <i>Ktedonobacter racemifer</i> DSM 44963                 |
| <i>marF</i> | 347       | O-Methyltransferase                                               | 42%/59%              | <i>Streptomyces</i> sp. e14                              |
| <i>marG</i> | 352       | Histidinol-phosphate aminotransferase                             | 64%/73%              | AFW04575.1, <i>S. flocculus</i>                          |
| <i>marH</i> | 129       | Cupin protein                                                     | 87%/90%              | KHK89141.1, <i>S. pluripotens</i>                        |
| <i>marI</i> | 345       | Methyltransferase                                                 | 29%/43%              | <i>S. hygrosopicus</i> NRRL 30439                        |
| <i>marJ</i> | 84        | PCP domain                                                        | 51%/71%              | <i>Chitinophaga pinensis</i> DSM 2588                    |
| <i>marK</i> | 349       | 2-Dehydropantoate 2-reductase                                     | 38%/47%              | <i>S. avermitilis</i> MA-4680                            |
| <i>marL</i> | 102       | Coronafacic acid synthetase, acyl carrier protein component, cfa1 | 49%/76%              | <i>Bacillus cereus</i> NVH0597-99                        |
| <i>marM</i> | 1383      | Nonribosomal peptide synthetase, C-A-PCP                          | 88%/90%              | <i>Actinobacteria bacterium</i> OV320                    |
| <i>marN</i> | 337       | Dehydrogenase                                                     | 44%/54%              | <i>Amycolatopsis japonica</i>                            |
| <i>marO</i> | 413       | Putative beta-ketoacyl synthase, KS                               | 37%/55%              | <i>Photobacterium profundum</i> SS9                      |
| <i>marP</i> | 142       | SnoaL_4 super family (cl09109)                                    | 43%/55%              | <i>Prauserella marina</i>                                |
| <i>marQ</i> | 852       | NRPS, A domain                                                    | 43%/55%              | <i>Micromonospora</i> sp. ML1                            |

**Table S4.** HR-ESI-MS data of the compounds

| Compound                 | Calcd. [M+H] <sup>+</sup> | Found [M+H] <sup>+</sup> |
|--------------------------|---------------------------|--------------------------|
| FR900452 ( <b>1</b> )    | 412.1650                  | 412.1655                 |
| FR900452 B ( <b>2</b> )  | 414.1867                  | 414.1894                 |
| FR900452 C ( <b>3</b> )  | 428.1599                  | 428.1607                 |
| Maremycin G ( <b>4</b> ) | 408.1376                  | 408.1388                 |
| Maremycin F ( <b>5</b> ) | 424.1331                  | 424.1329                 |
| Maremycin A ( <b>6</b> ) | 364.1286                  | 364.1340                 |
| Maremycin B ( <b>7</b> ) | 364.1286                  | 364.1341                 |
| *Compound (*)            | 412.1650                  | 412.1648                 |

\*Compound is the isomer of **1**

**Table S5.** NMR data of compound **1** (CDCl<sub>3</sub>;  $\delta_{\text{H}}$  7.26 ppm,  $\delta_{\text{C}}$  77.0 ppm)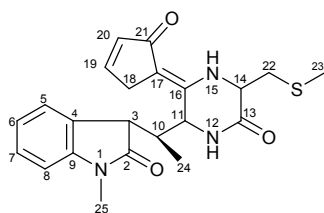

| No. | $\delta_{\text{H}}$ | $\delta_{\text{C}}$ | No. | $\delta_{\text{H}}$  | $\delta_{\text{C}}$ |
|-----|---------------------|---------------------|-----|----------------------|---------------------|
| 2   |                     | 176.1 (s)           | 14  | 4.33 (m)             | 56.7 (d)            |
| 3   | 3.96 (d, 3.0)       | 44.2 (d)            | 15  | 10.15 (d, 4.3)       |                     |
| 4   |                     | 127.2 (s)           | 16  |                      | 150.1 (s)           |
| 5   | 7.13 (d, 7.6)       | 123.2 (d)           | 17  |                      | 104.9 (s)           |
| 6   | 7.09 (t, 7.6)       | 123.1 (d)           | 18  | 3.18 (br d, 22.4)    | 34.5 (t)            |
|     |                     |                     |     | 3.26 (br d, 22.4)    |                     |
| 7   | 7.31 (t, 7.6)       | 128.4 (d)           | 19  | 7.22 (br d, 5.8)     | 151.1 (d)           |
| 8   | 6.87 (d, 7.6)       | 108.5 (d)           | 20  | 6.34 (br d, 5.8)     | 136.3 (d)           |
| 9   |                     | 144.3 (s)           | 21  |                      | 196.8 (s)           |
| 10  | 3.00 (m)            | 45.9 (d)            | 22  | 3.08 (dd, 14.0, 7.3) | 39.2 (t)            |
|     |                     |                     |     | 3.15 (dd, 14.0, 3.4) |                     |
| 11  | 4.49 (dd, 9.6, 4.3) | 54.8 (d)            | 23  | 2.27 (s)             | 16.9 (q)            |
| 12  | 7.05 (br s)         |                     | 24  | 0.72 (d, 7.0)        | 13.2 (q)            |
| 13  |                     | 168.1 (s)           | 25  | 3.23 (s)             | 26.2 (q)            |

**Table S6.** NMR data of compound **2** (DMSO-*d*<sub>6</sub>;  $\delta_{\text{H}}$  2.49 ppm,  $\delta_{\text{C}}$  39.5 ppm)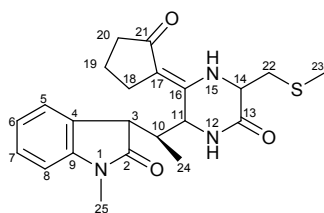

| No. | $\delta_{\text{H}}$                          | $\delta_{\text{C}}$ | HMBC                            | $^1\text{H}$ , $^1\text{H}$ -COSY |
|-----|----------------------------------------------|---------------------|---------------------------------|-----------------------------------|
| 2   |                                              | 175.5 (s)           |                                 |                                   |
| 3   | 3.93 (d, 2.2)                                | 44.8 (d)            | C-2, C-4, C-9, C-10, C-11, C-25 | H-10                              |
| 4   |                                              | 127.5 (s)           |                                 |                                   |
| 5   | 7.24 (d, 7.6)                                | 123.1 (d)           | C-3, C-7, C-9                   | H-6                               |
| 6   | 7.06 (t, 7.6)                                | 122.4 (d)           | C-4, C-8                        | H-5, H-7                          |
| 7   | 7.30 (t, 7.6)                                | 128.1 (d)           | C-5, C-9                        | H-6, H-8                          |
| 8   | 7.01 (d, 7.6)                                | 108.5 (d)           | C-4, C-6                        | H-7                               |
| 9   |                                              | 144.3 (s)           |                                 |                                   |
| 10  | 2.47 (m)                                     | 45.5 (d)            | C-2, C-11, C-25                 | H-3, H-11, H-25                   |
| 11  | 4.73 (dd, 9.6, 4.5)                          | 52.3 (d)            | C-10, C-13, C-16, C-17          | H-10, H-12                        |
| 12  | 9.02 (d, 4.5)                                |                     | C-11, C-13, C-14, C-16          | H-11                              |
| 13  |                                              | 168.0 (s)           |                                 |                                   |
| 14  | 4.19 (m)                                     | 55.4 (d)            | C-13, C-16, C-22                | H-15, H-22                        |
| 15  | 10.30 (d, 4.9)                               |                     | C-11, C-13, C-14, C-17          | H-14                              |
| 16  |                                              | 150.8 (s)           |                                 |                                   |
| 17  |                                              | 103.2 (s)           |                                 |                                   |
| 18  | 2.46 (m), 2.56 (m)                           | 28.0 (t)            | C-16, C-17, C-19, C-20, C-21    | H-19                              |
| 19  | 1.72–1.82 (m)                                | 20.8 (t)            | C-17, C-18, C-20, C-21          | H-18, H-20                        |
| 20  | 2.14–2.25 (m)                                | 38.6 (t)            | C-18, C-19, C-21                | H-19                              |
| 21  |                                              | 203.7 (s)           |                                 |                                   |
| 22  | 2.86 (dd, 14.0, 9.3)<br>3.02 (dd, 14.0, 3.6) | 38.8 (t)            | C-13, C-14, C-24                | H-14                              |
| 23  | 2.16 (s)                                     | 15.6 (q)            | C-22                            |                                   |
| 24  | 0.54 (d, 7.1)                                | 11.0 (q)            | C-3, C-10, C-11                 | H-10                              |
| 25  | 3.13 (s)                                     | 25.8 (q)            | C-2, C-9                        |                                   |

**Table S7.** NMR data of compound **3** (CDCl<sub>3</sub>;  $\delta_{\text{H}}$  7.26 ppm,  $\delta_{\text{C}}$  77.0 ppm)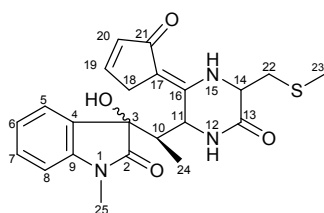

| No.  | $\delta_{\text{H}}$                                      | $\delta_{\text{C}}$ | HMBC                        | $^1\text{H}$ , $^1\text{H}$ -COSY |
|------|----------------------------------------------------------|---------------------|-----------------------------|-----------------------------------|
| 2    |                                                          | 176.3 (s)           |                             |                                   |
| 3    |                                                          | 78.7 (s)            |                             |                                   |
| 3-OH | 4.36 (s)                                                 |                     | C-2, C-3, C-4, C-10         |                                   |
| 4    |                                                          | 130.3 (s)           |                             |                                   |
| 5    | 7.35 (d, 7.6)                                            | 123.0 (d)           | C-3, C-7, C-9               | H-6                               |
| 6    | 7.15 (t, 7.6)                                            | 123.7 (d)           | C-4, C-8                    | H-5, H-7                          |
| 7    | 7.36 (t, 7.6)                                            | 130.3 (d)           | C-5, C-9                    | H-6, H-8                          |
| 8    | 6.84 (d, 7.6)                                            | 108.5 (d)           | C-4, C-6                    | H-7                               |
| 9    |                                                          | 143.1 (s)           |                             |                                   |
| 10   | 2.73 (m)                                                 | 50.2 (d)            | C-2, C-3, C-4, C-11, C-25   | H-11, H-25                        |
| 11   | 5.19 (dd, 8.0, 4.1)                                      | 52.3 (d)            | C-3, C-10, C-13, C-16, C-17 | H-10, H-12                        |
| 12   | 7.32 (d, 4.1)                                            |                     | C-13, C-14, C-16            | H-11                              |
| 13   |                                                          | 169.0 (s)           |                             |                                   |
| 14   | 4.16 (m)                                                 | 55.8 (d)            | C-13, C-22                  | H-15, H-22                        |
| 15   | 10.28 (d, 4.8)                                           |                     | C-11, C-13, C-14, C-17      | H-14                              |
| 16   |                                                          | 149.1 (s)           |                             |                                   |
| 17   |                                                          | 104.7 (s)           |                             |                                   |
| 18   | 3.12 (ddd, 22.4, 2.2, 1.9)<br>3.31 (ddd, 22.4, 2.2, 1.9) | 34.8 (t)            | C-17, C-19, C-20, C-21      | H-19, H-20                        |
| 19   | 7.23 (dt, 5.8, 2.2)                                      | 151.3 (d)           | C-17, C-18, C-20, C-21      | H-18, H-20                        |
| 20   | 6.28 (dt, 5.8, 1.9)                                      | 136.1 (d)           | C-17, C-18, C-19, C-21      | H-18, H-19                        |
| 21   |                                                          | 196.7 (s)           |                             |                                   |
| 22   | 2.86 (dd, 13.9, 8.2)<br>3.01 (dd, 13.9, 3.6)             | 39.3 (t)            | C-13, C-14, C-24            | H-14                              |
| 23   | 2.21 (s)                                                 | 16.7 (q)            | C-22                        |                                   |
| 24   | 0.56 (d, 7.4)                                            | 11.9 (q)            | C-3, C-10, C-11             | H-10                              |
| 25   | 3.20 (s)                                                 | 26.1 (q)            | C-2, C-9                    |                                   |

## Results Figures

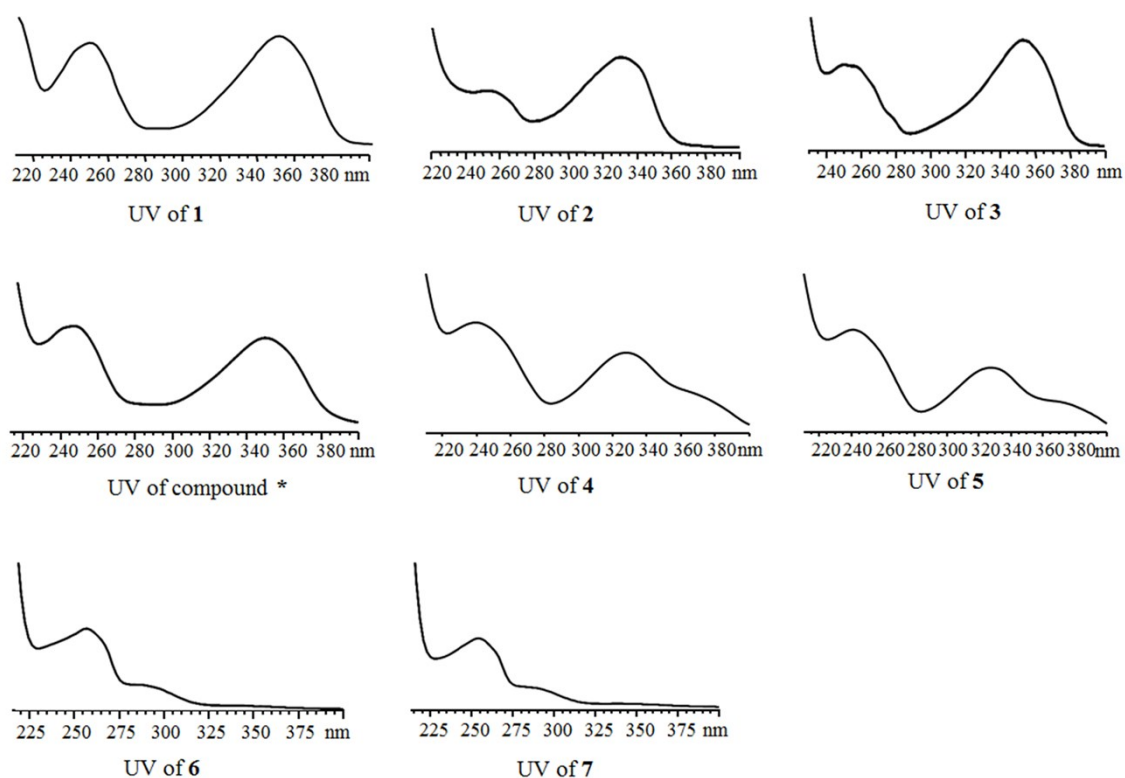

**Figure S1.** UV spectra of the metabolites of *Streptomyces* sp. B9173. **1, 4 and 5** show UV absorption at both 254 nm and 347 nm; **2 and 3** show strong UV absorption at 347 nm but weak absorption at 254 nm; **6 and 7** exhibit no absorption at 347 nm but strong absorption at 254 nm. Thus we used 347 nm to detect **1-5** and 254 nm to detect **6 and 7** in this work.



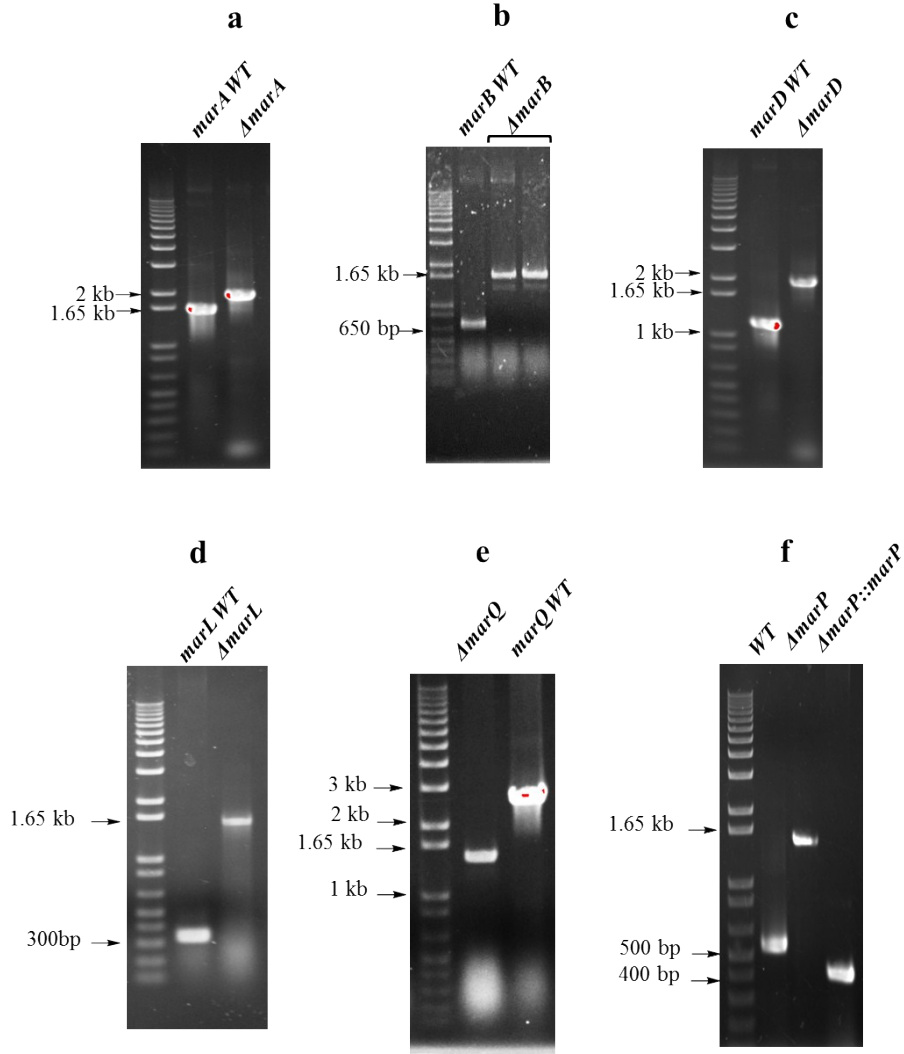

**Figure S2.** Confirmation of gene-inactivation and complementation mutants, (a-f) PCR is carried out with genomic DNA of *Streptomyces* sp. B9173 wild type (WT) and its mutants as templates. Primer pairs are the same as those used for cloning and expression of the *mar* genes (Table S2). (a) *marA* was replaced with *aac(3)IV*. Primer pair (*marAVtarF* / *marAVtarR*) was used to amplify a 1550 bp fragment from B9173 WT and a 1814 bp fragment from mutant  $\Delta marA::aac(3)IV$ . (b) *marB* was replaced with *aac(3)IV*. Primer pair (*marBVtarF* / *marBVtarR*) was used to amplify a 688 bp fragment from B9173 WT and a 1556 bp fragment from mutant  $\Delta marB::aac(3)IV$ . (c) *marD* was replaced with *aac(3)IV*. Primer pair (*marDVtarF* / *marDVtarR*) was used to amplify a 1123 bp fragment from B9173 WT and a 1784 bp fragment from mutant  $\Delta marD::aac(3)IV$ . (d) *marL* was replaced with *aac(3)IV*. Primer pair (*marLVtarF* / *marLVtarR*) was used to amplify a 310 bp fragment from B9173 WT and a 1384 bp fragment from mutant  $\Delta marL::aac(3)IV$ . (e) The *marQ* was replaced with *aac(3)IV*. Primer pair (*marQVtarF* / *marQVtarR*) was used to amplify a 2656 bp fragment from B9173 WT and a 1481 bp fragment from mutant  $\Delta marQ::aac(3)IV$ . (f) The *marP* was replaced with *aac(3)IV*, and the complement of *marP* to  $\Delta marP$  mutant. Primer pair (*marPVtarF* / *marPVtarR*) was used to amplify a 540 bp fragment from B9173 WT and a 1495 bp fragment from mutant  $\Delta marP::aac(3)IV$ . Primer pair (*CmarPF* / *CmarPR*) was used to amplify a 429 bp *marP* fragment from  $\Delta marP::marP$ .

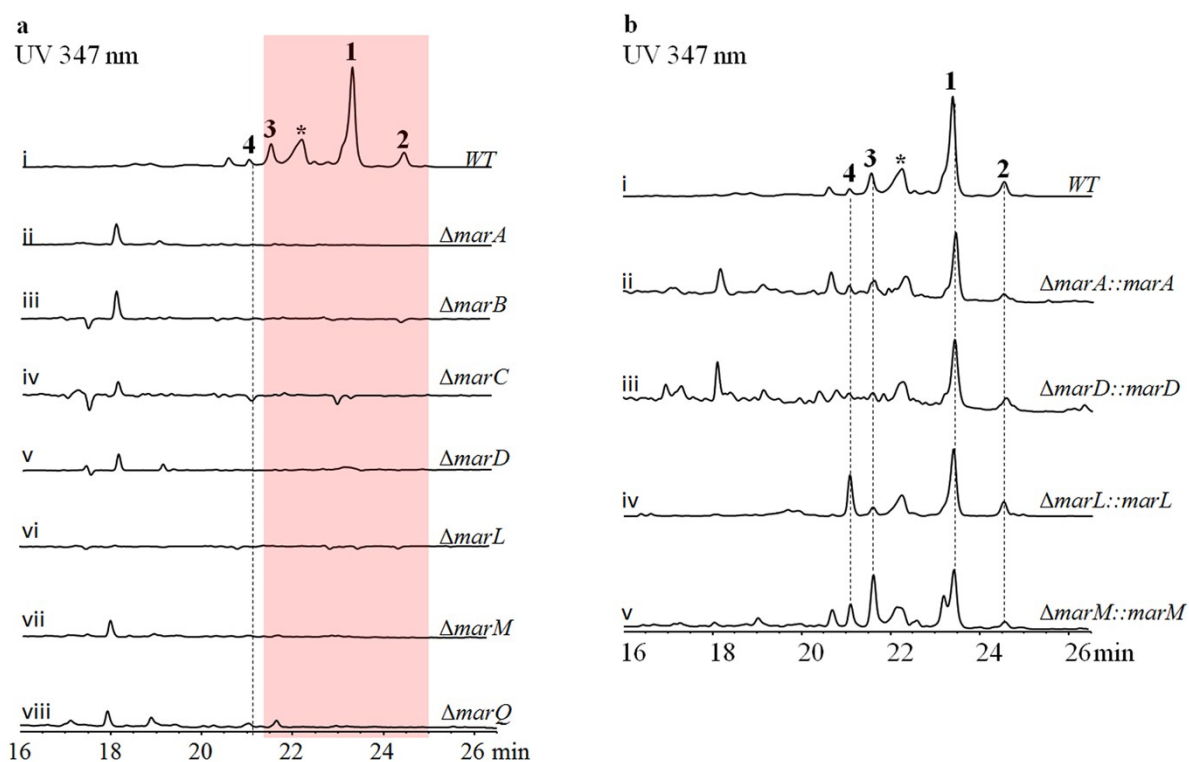

**Figure S3.** Genetic characterization of the structural genes for the biosynthesis of **1-4** *in vivo*. (a) HPLC analysis of **1-4** (UV at 347 nm) from (a-i) *Streptomyces* sp. B9173 wild type, (a-ii) JL1002 ( $\Delta marA$  mutant strain), (a-iii) JL1003 ( $\Delta marB$  mutant strain), (a-iv) LS24 ( $\Delta marC$  mutant strain), (a-v) JL1004 ( $\Delta marD$  mutant strain), (a-vi) JL1005 ( $\Delta marL$  mutant strain), (a-vii) LS29 ( $\Delta marM$  mutant strain), (a-viii) JL1007 ( $\Delta marQ$  mutant strain). (b) HPLC analysis of **1-4** (UV at 347 nm) from the gene complementary strains of (b-ii) JL1009 ( $\Delta marA::marA$  complementary strain), (b-iii) JL1010 ( $\Delta marD::marD$  complementary strain), (b-iv) JL1011 ( $\Delta marL::marL$  complementary strain), (b-v) JL1012 ( $\Delta marM::marM$  complementary strain). The peak marked by an asterisk (\*) was identified as an isomer of **1** by HRMS.

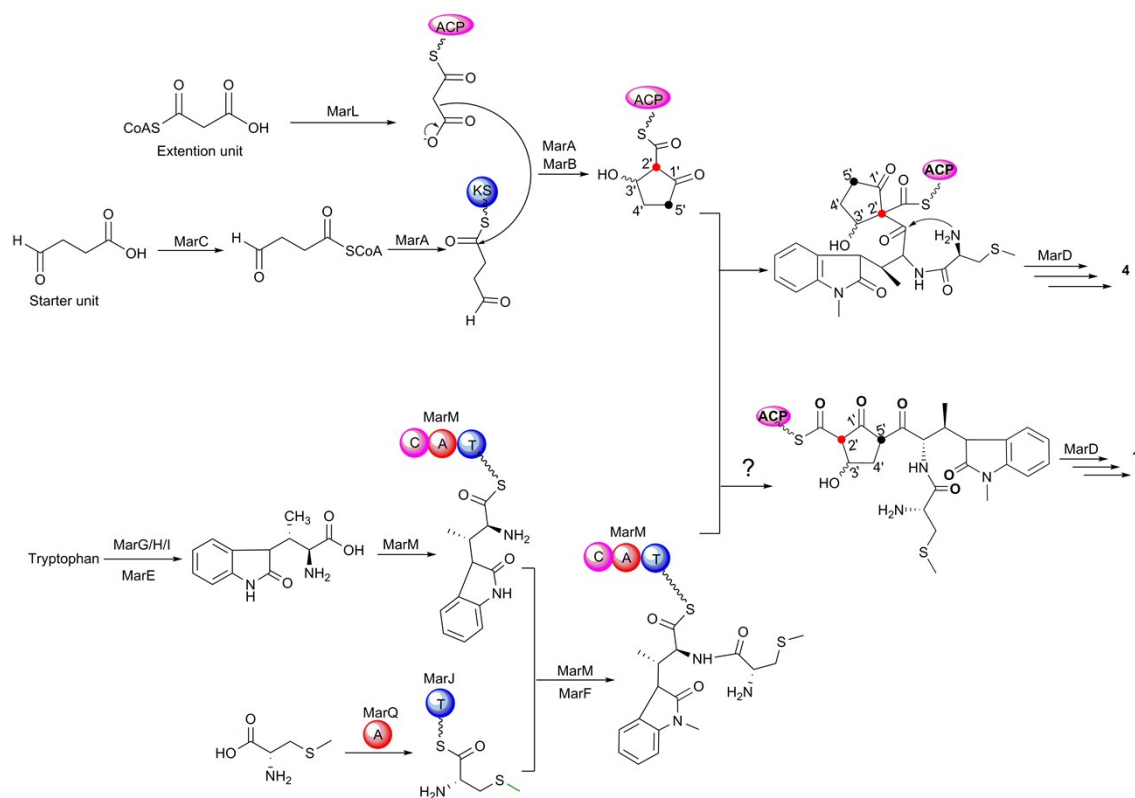

**Figure S4.** Proposed biosynthetic pathway of **1** and **4**.

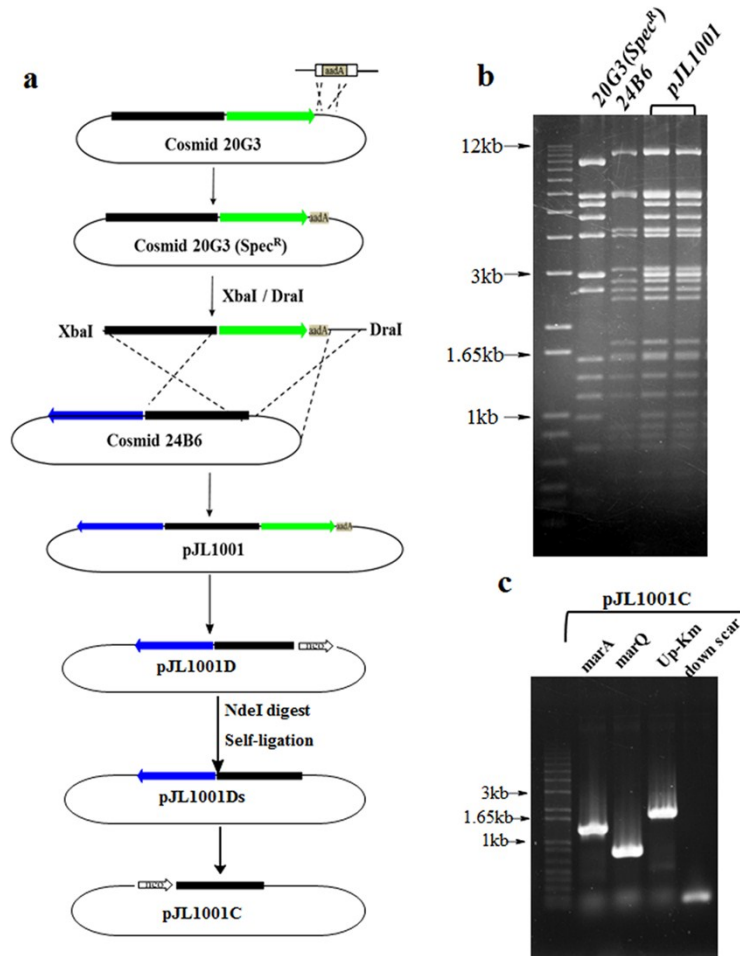

**Figure S5.** Cosmids combination and fragment deletions to construct pJL1001 and pJL1001C. (a) Schematic diagram for the cosmids combination and fragment deletions. (b) Restriction enzyme digestion maps of the cosmids (pJL1001, cosmid 20G3 and cosmid 24B6) by BamHI enzyme. (c) The upstream genes (~25 kb) out of the *mar* cluster were replaced with *neo*, and the *neo* in downstream genes was cut by NdeI and then self-ligated. PCR is carried out with DNA of pJL1001C as template. Primer pair (*upstreamVtarF/upstreamVtarR*) was used to amplify the 1.5 kb kanamycin resistance cassette in upstream genes of pJL1001C, primer pair (*downstreamVtarF/downstreamVtarR*) was used to amplify the 200 bp scar in downstream genes of pJL1001C, primer pair (*marA PCR-F/marA PCR-R*) and primer pair (*marQ innerPCR-F/marQ innerPCR-R*) were used to amplify *marA* gene and 742 bp fragment of *marQ* gene so as to confirm the integrity of *mar* cluster in pJL1001C.

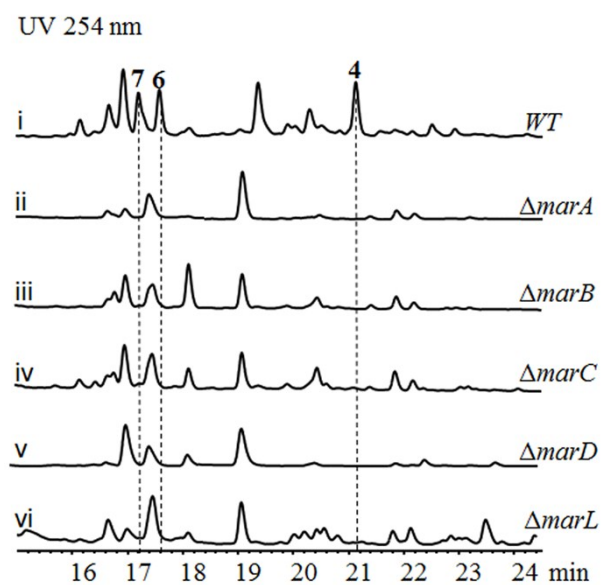

**Figure S6.** Characterization of the PKS genes ( $\Delta marA \sim \Delta marD$ ,  $\Delta marL$ ) for the biosynthesis of **4** and **6-7** *in vivo*. HPLC analysis the production of f **4** and **6-7** (UV 254 nm) from (i) *Streptomyces* sp. B9173 wild type, (ii) JL1002 ( $\Delta marA$  mutant strain), (iii) JL1003 ( $\Delta marB$  mutant strain), (iv) LS24 ( $\Delta marC$  mutant strain), (v) JL1004 ( $\Delta marD$  mutant strain), (vi) JL1005 ( $\Delta marL$  mutant strain).

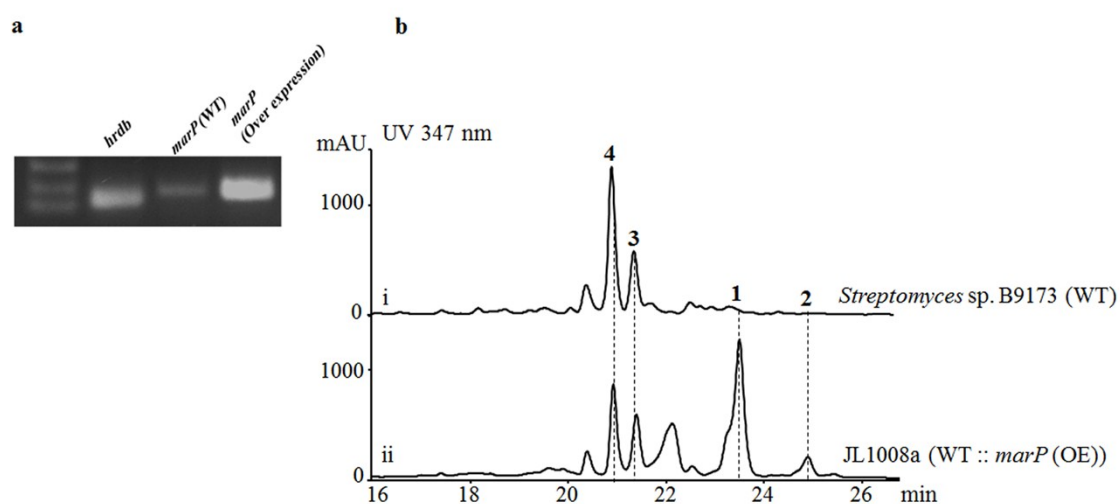

**Figure S7.** Characterization of 1-3 and 4 production in *Streptomyces* sp. B9173 and the recombinant strain JL1008a fermented for 72 h. (a) Semi-quantitative RT-PCR analysis of the over-expression of *marP* in *Streptomyces* sp. B9173, using *hrdb* gene as a house-keeping gene. (b) HPLC analysis of the metabolites from (i) *Streptomyces* sp. B9173 wild type strain and (ii) recombination strain for *marP* overexpression.

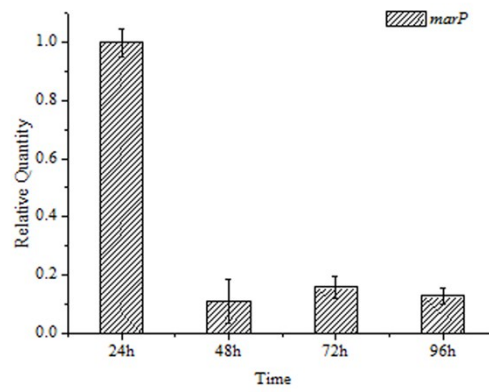

**Figure S8.** Transcription levels of the *marP* gene in different growth stages of *Streptomyces* sp. B9173. The cDNA quantity of *marP* gene from the mycelia of 24 h culture broth was used as relative control.

## NMR Figures

$^1\text{H}$  NMR spectrum of **1** (600 MHz,  $\text{CDCl}_3$ ).

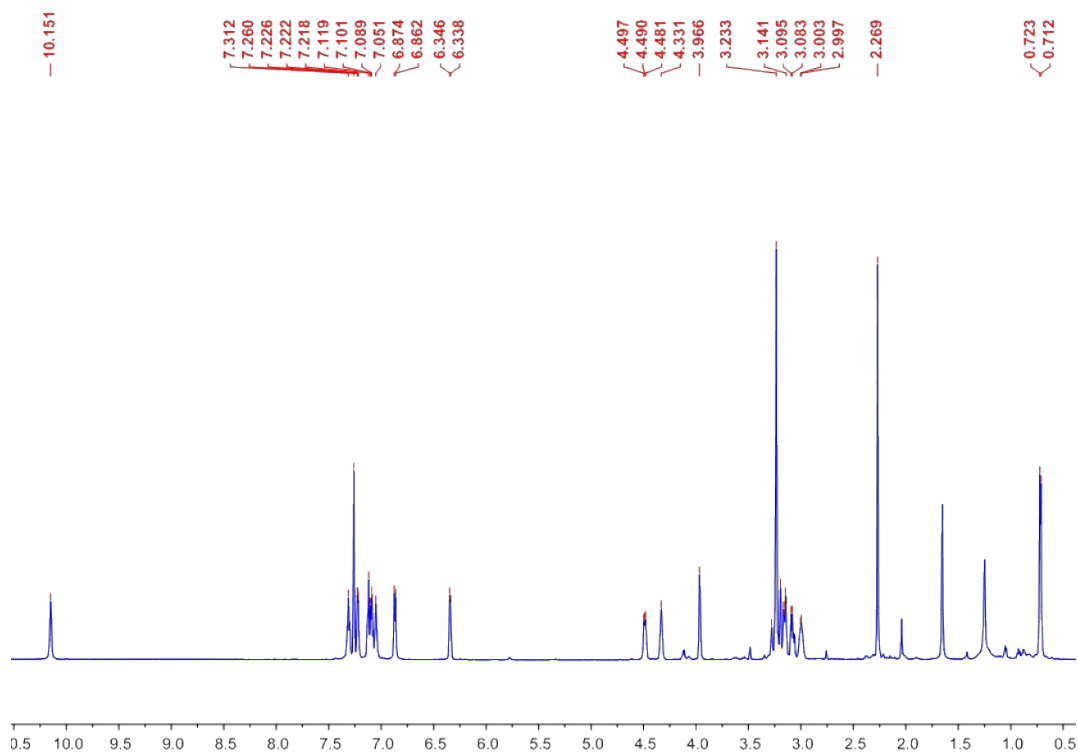

$^{13}\text{C}$  NMR spectrum of **1** (150 MHz,  $\text{CDCl}_3$ ).

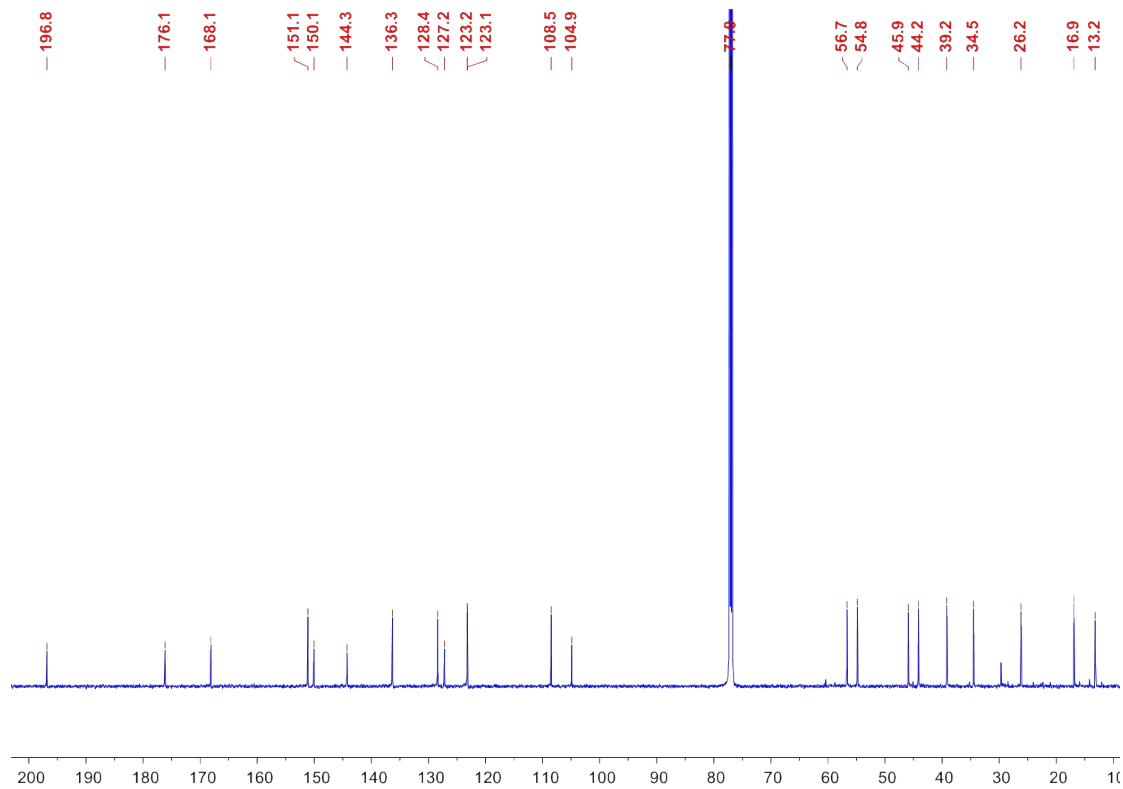

Figure S9.  $^1\text{H}$  and  $^{13}\text{C}$  NMR spectra of **1**



$^1\text{H}$  NMR spectrum of **2** (600 MHz,  $\text{DMSO-}d_6$ ).

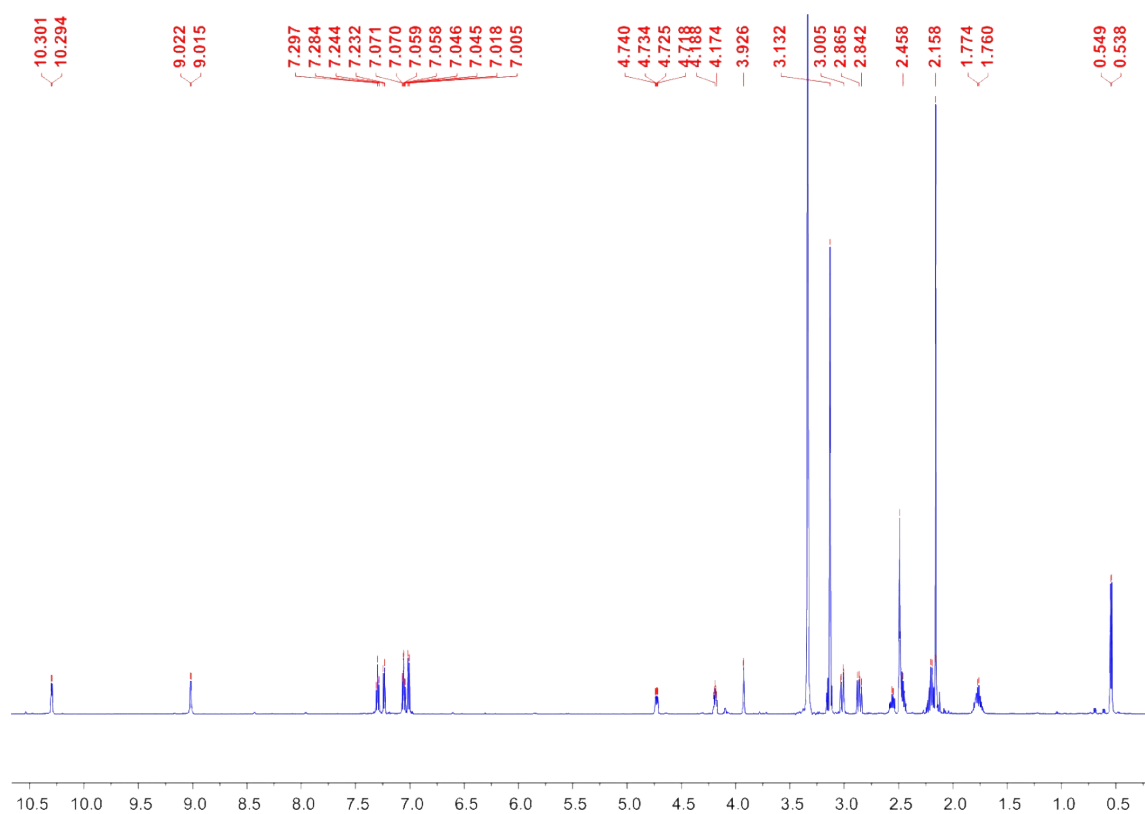

$^{13}\text{C}$  NMR spectrum of **2** (150 MHz,  $\text{DMSO-}d_6$ )

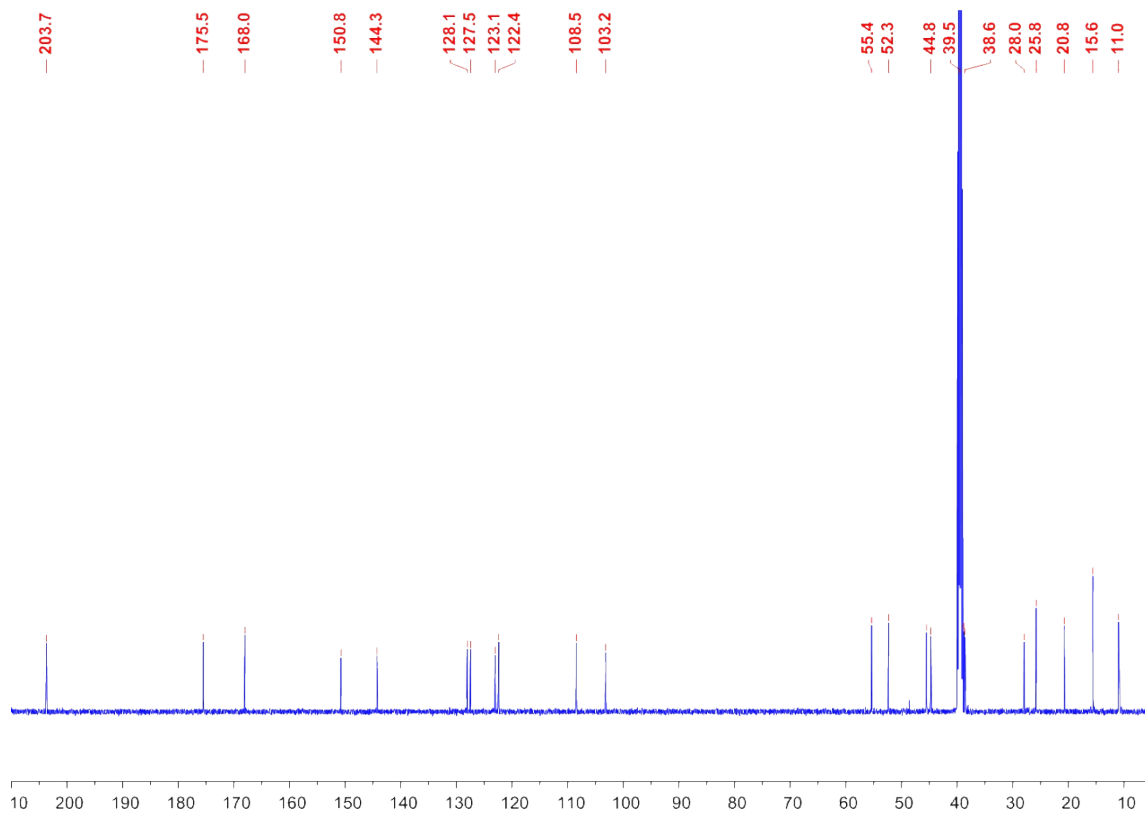

**Figure S10.**  $^1\text{H}$  and  $^{13}\text{C}$  NMR spectra of **2**

HSQC spectrum of **2**

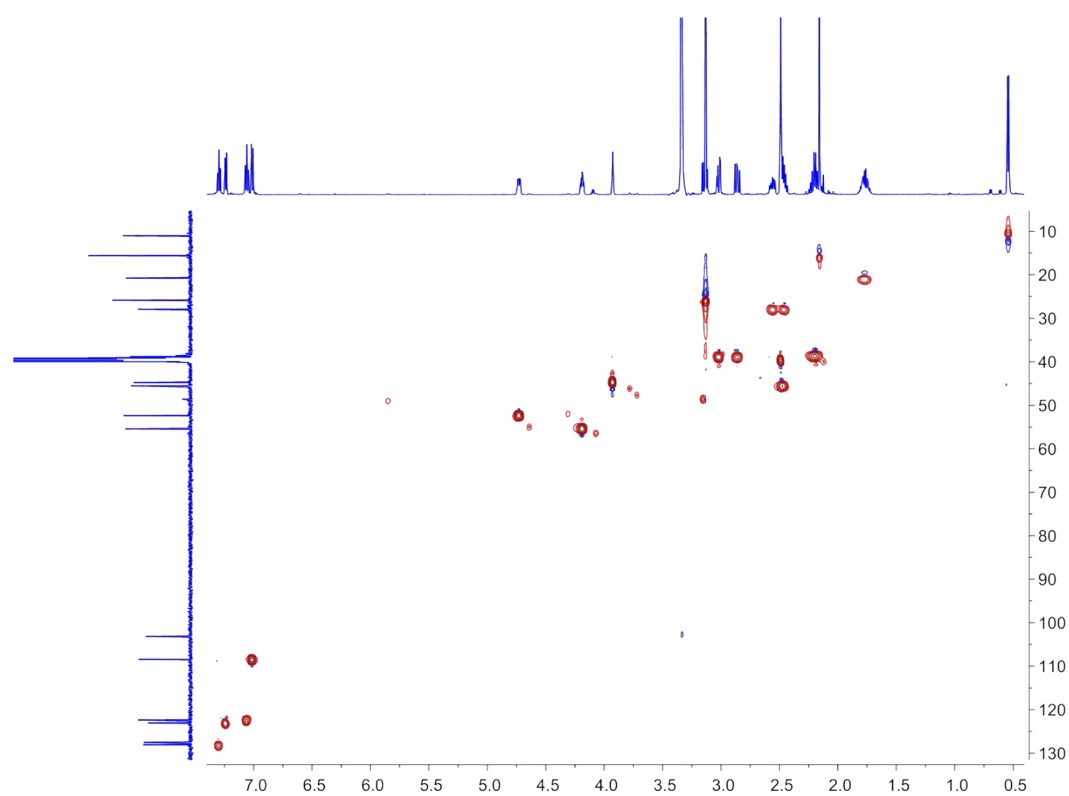

HMBC spectrum of **2**

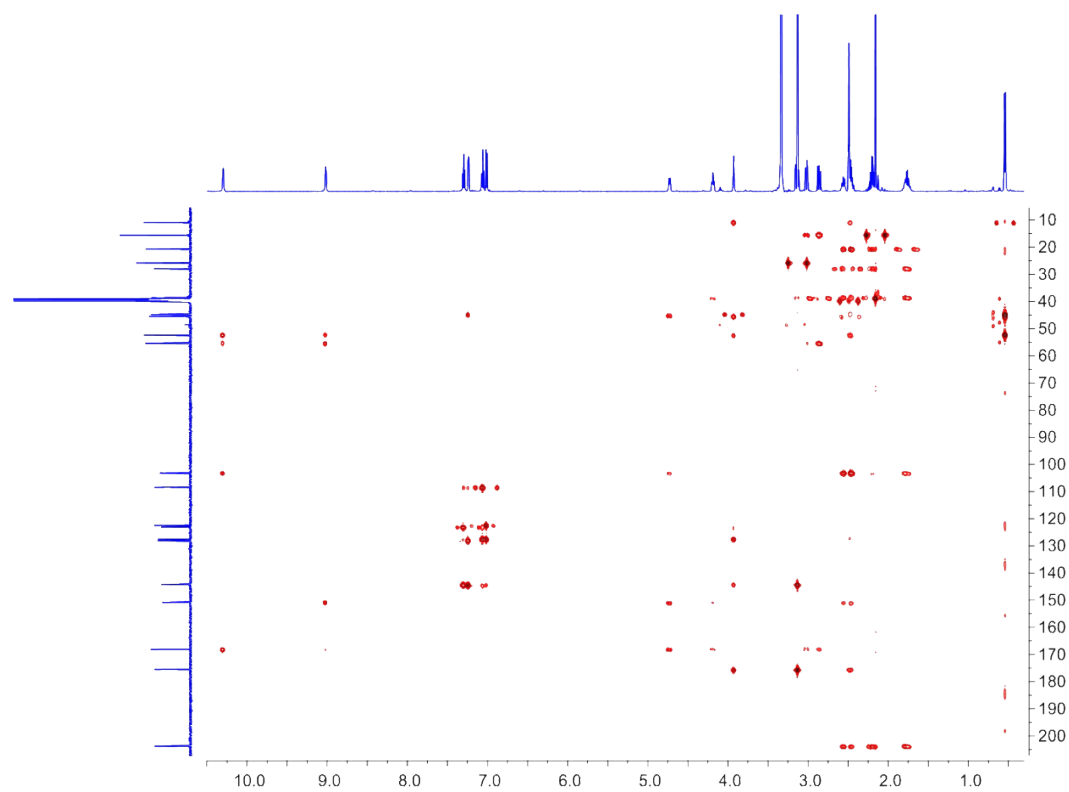

**Figure S11.** HSQC and HMBC NMR spectra of **2**

$^1\text{H}$ ,  $^1\text{H}$ -COSY spectrum of **2**

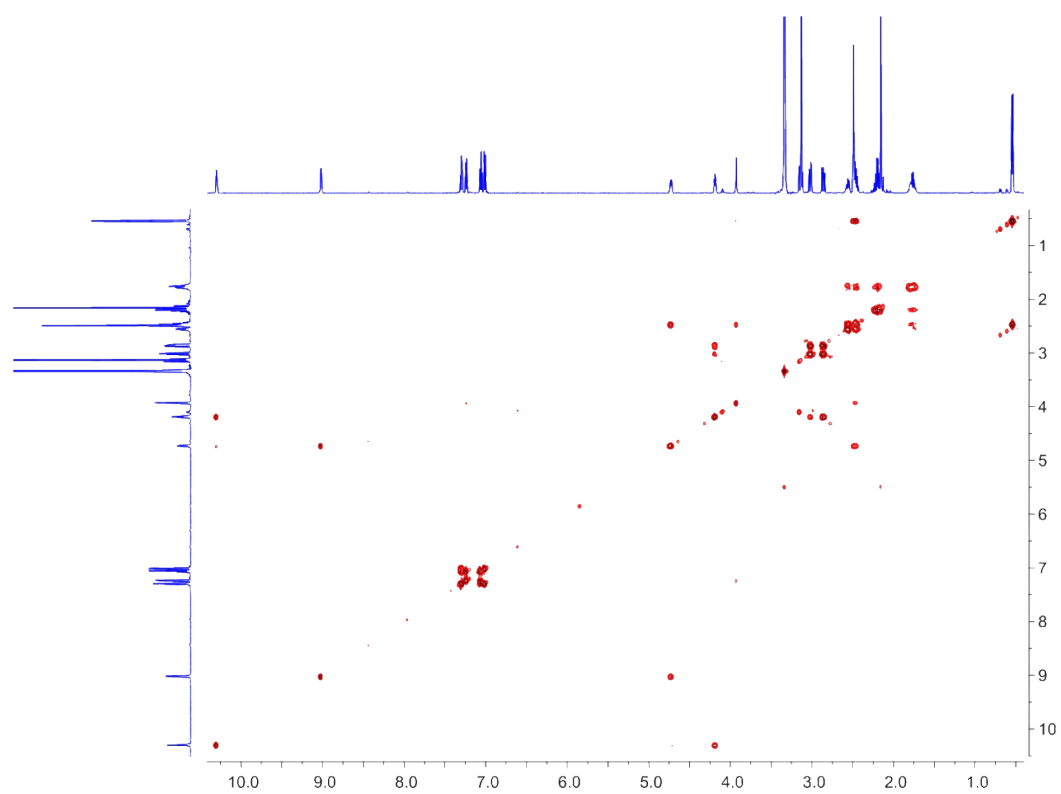

NOESY spectrum of **2**

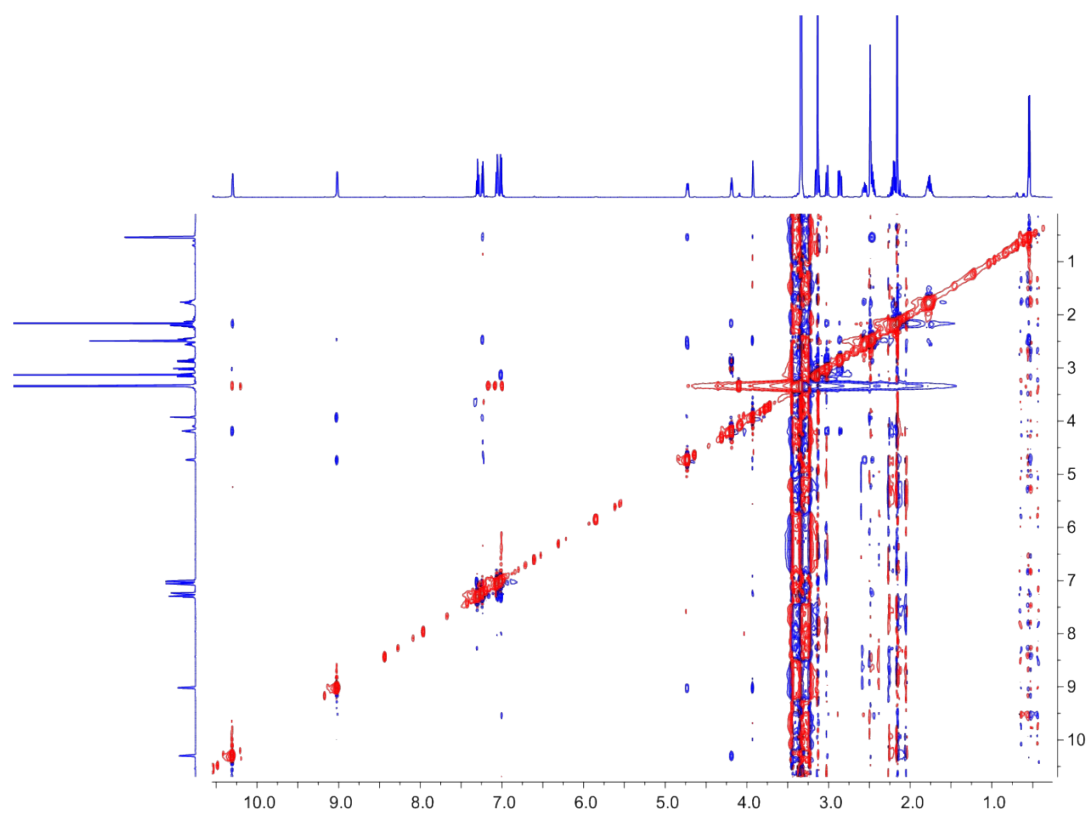

**Figure S12.** COSY and NOESY NMR spectra of **2**

$^1\text{H}$  NMR spectrum of **3** (600 MHz,  $\text{CDCl}_3$ )

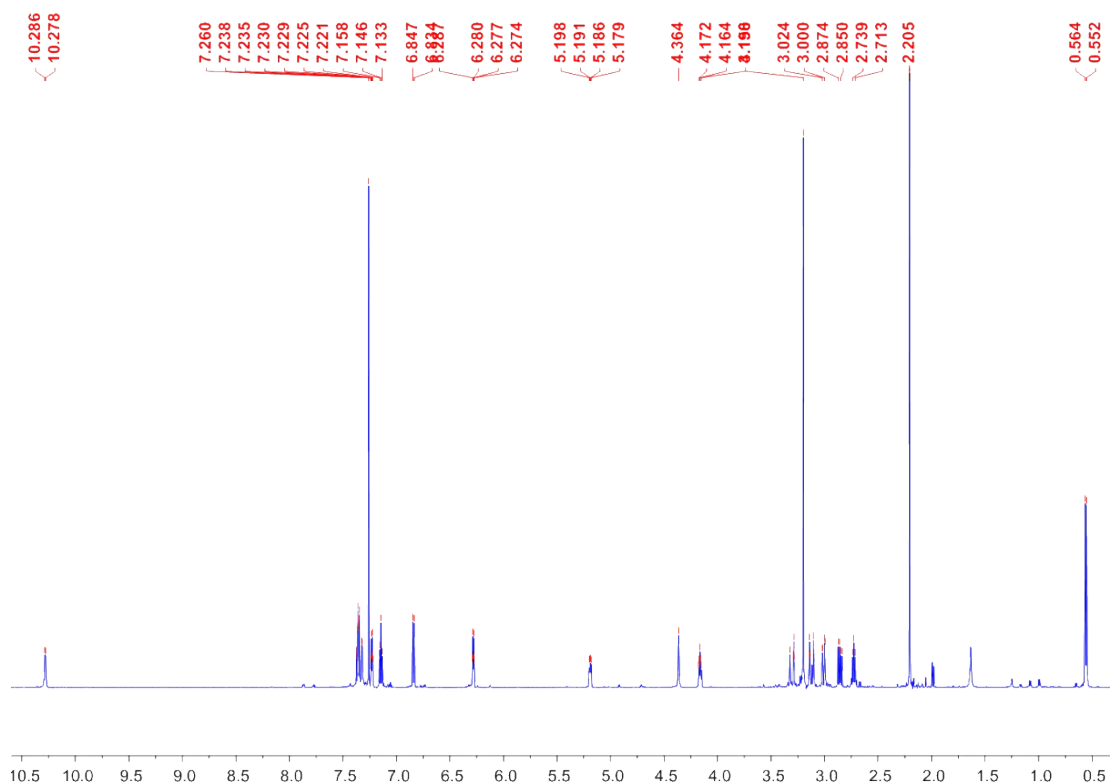

$^{13}\text{C}$  NMR spectrum of **3** (150 MHz,  $\text{CDCl}_3$ )

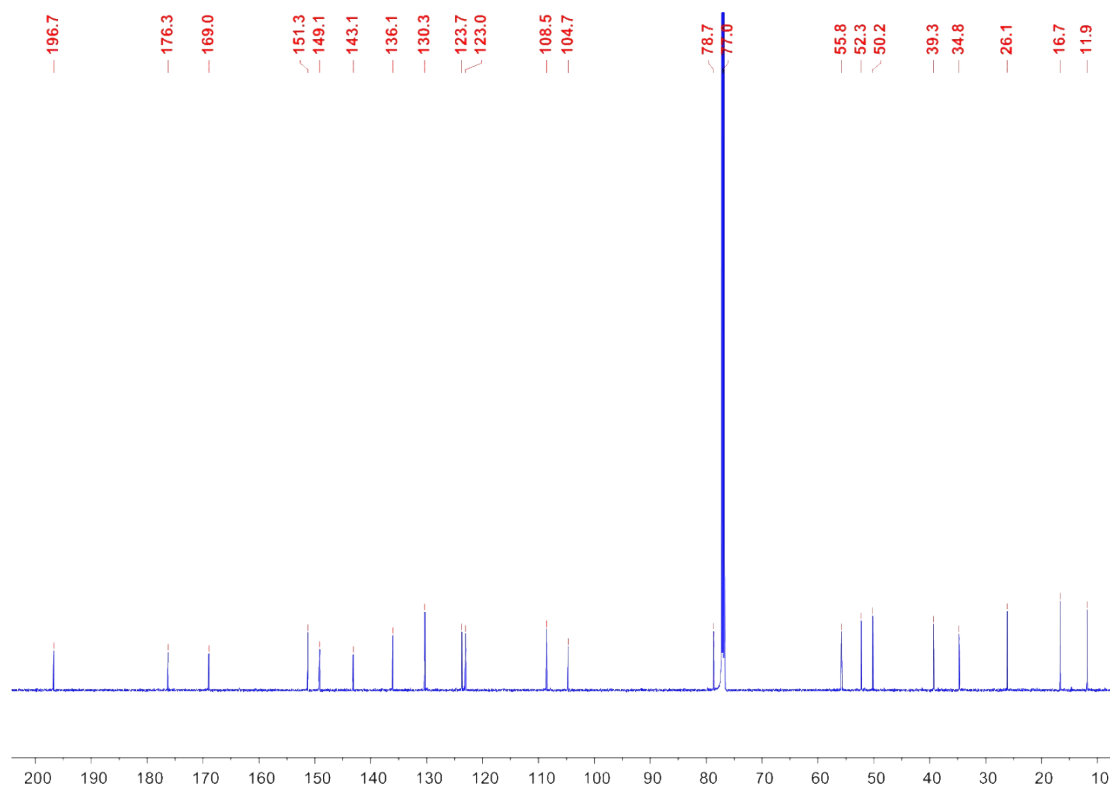

**Figure S13.**  $^1\text{H}$  and  $^{13}\text{C}$  NMR spectra of **3**

HSQC spectrum of **3**

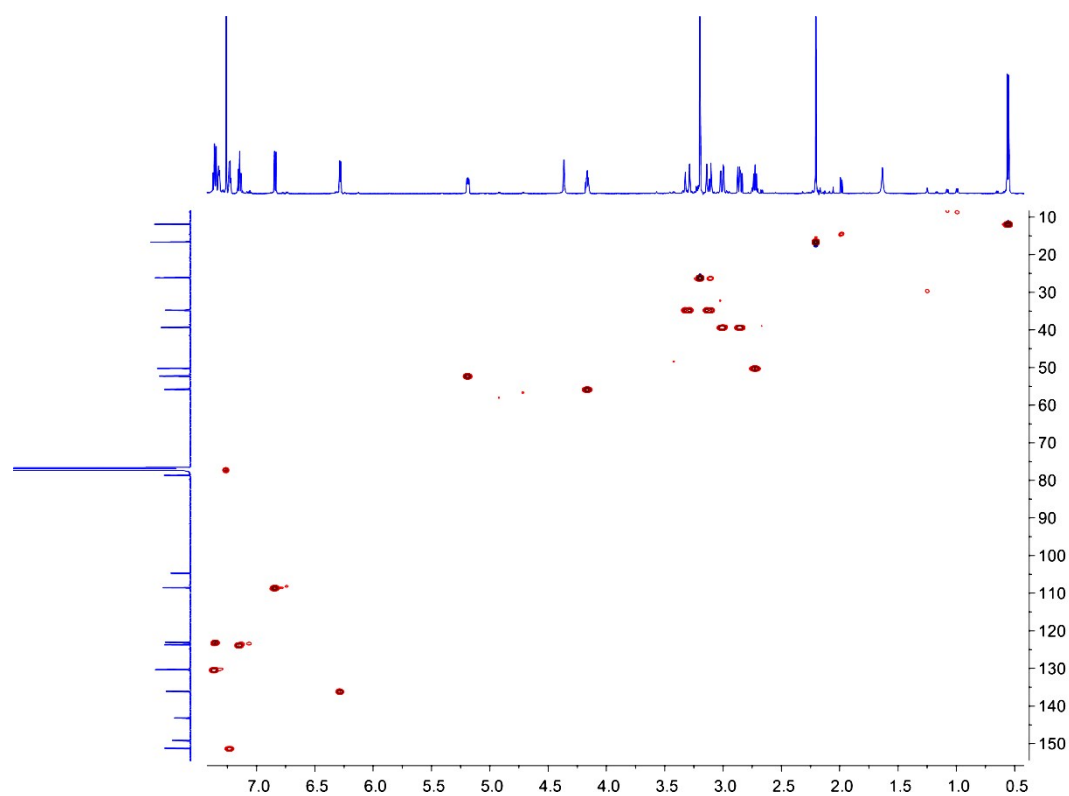

HMBC spectrum of **3**

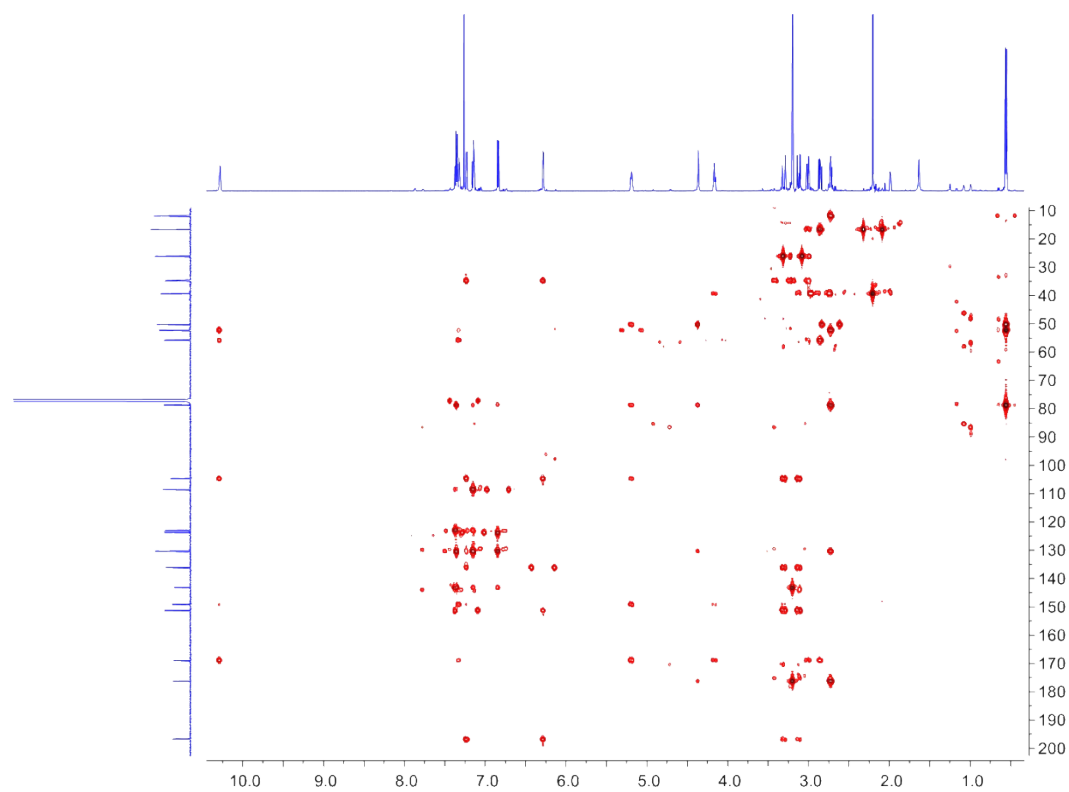

**Figure S14.** HSQC and HMBC NMR spectra of **3**

$^1\text{H}$ ,  $^1\text{H}$ -COSY spectrum of **3**

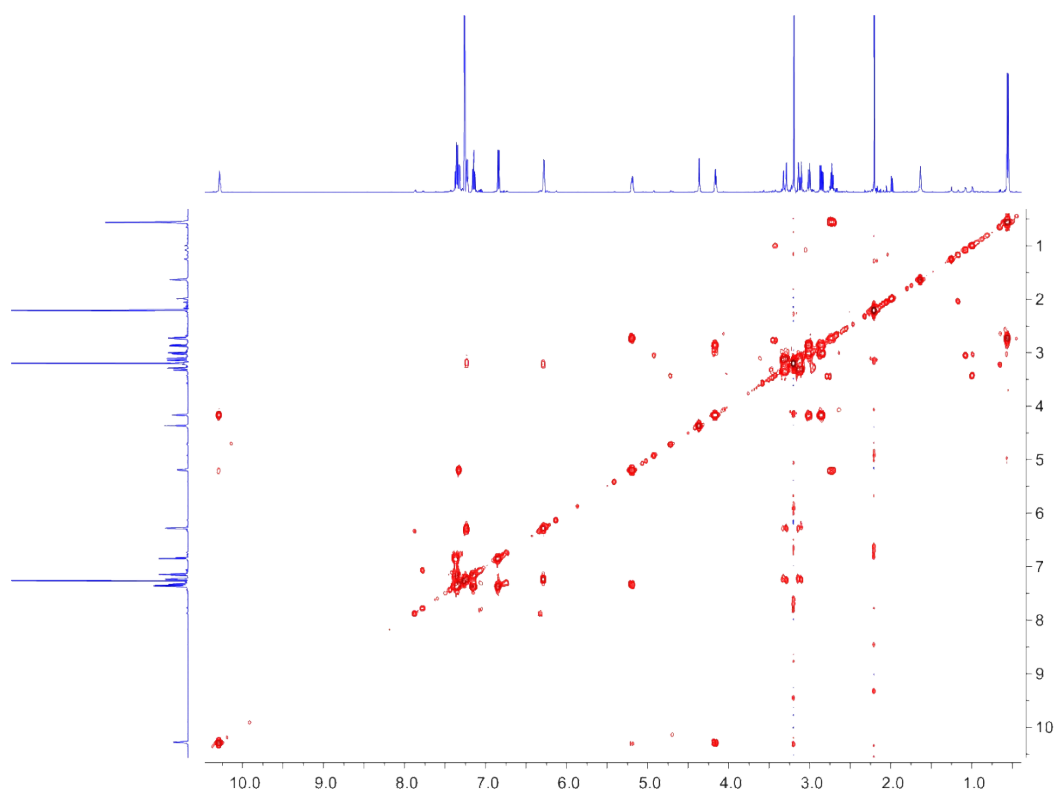

NOESY spectrum of **3**

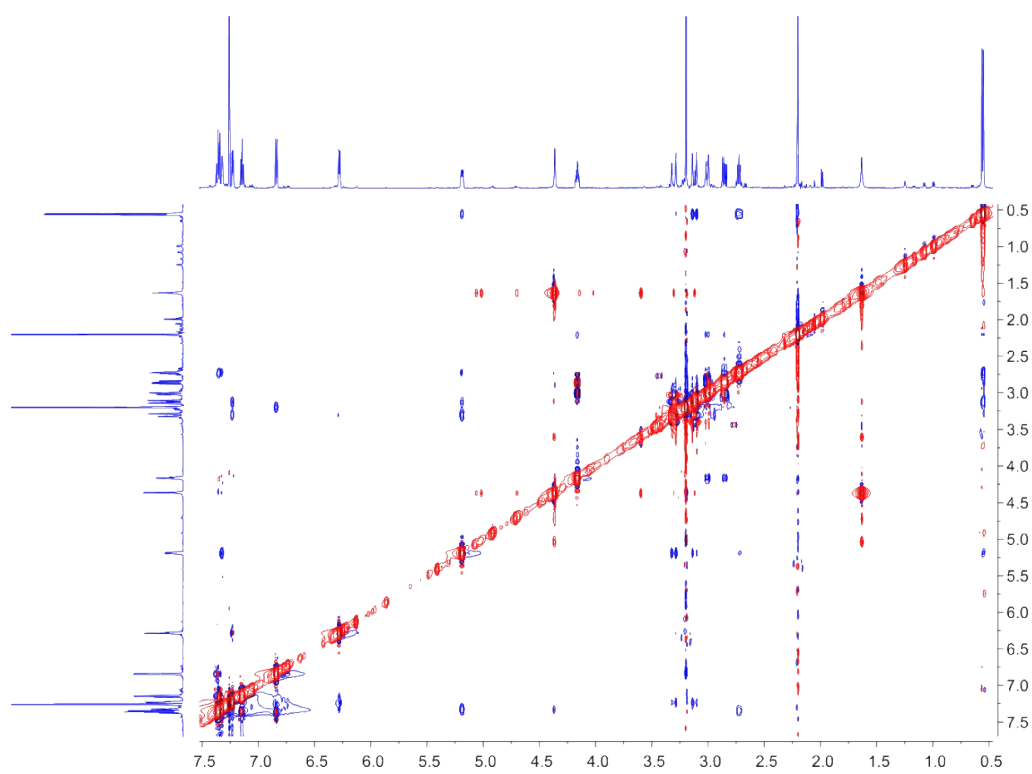

**Figure S15.** COSY and NOESY NMR spectra of **3**

## References

- 1 W. Chen, D. Qu, L. Zhai, M. Tao, Y. Wang, S. Lin, N. P. Price and Z. Deng, *Protein & cell*, 2010, **1**, 1093-1105.
- 2 L. Bown, Y. Li, F. Berrue, J. T. P. Verhoeven, S. C. Dufour and D. R. D. Bignell, *Appl. Environ. Microbiol.*, 2017, **83**, e01169-01117.
- 3 W. Balk-Bindseil, E. Helmke, H. Weyland and H. Laatsch, *Liebigs Annalen*, 1995, **0**, 1291-1294.
- 4 Y. Lan, Y. Zou, T. Huang, X. Wang, N. L. Brock, Z. Deng and S. Lin, *Sci. China Chem.*, 2016, **59**, 1224-1228.
- 5 B. Gust, G. L. Challis, K. Fowler, T. Kieser and K. F. Chater, *Proceedings of the National Academy of Sciences of the United States of America*, 2003, **100**, 1541-1546.
- 6 T. Kieser, M. J. Bibb, M. J. Buttner, K. F. Chater and D. A. Hopwood, *Practical streptomyces genetics*, John Innes Foundation, Norwich, United Kingdom, 2000.
